# Supplementary material for: Prevalence and causes of visual impairment in a Brazilian population: The Botucatu Eye Study
Source: Springer Nature journal article supplement (doi:10.1186/1471-2415-9-8), 2009-08-19
Supplement: Additional file 2 [file 1471-2415-9-8-s2.doc]

**Table 3 -** Distribution of patients with low vision and blindness according to the disease process diagnosed to be the main cause of visual impairment.

| **Eye Pathology** | **Presenting Low Vision**  **(%, 95% CI)** | **Presenting Blindness**  **(%, 95% CI)** | **WHO Low Vision**  **(%, 95% CI)** | **WHO Blindness**  **(%, 95% CI)** | **Presenting VI**  **(%, 95% CI)** | **WHO VI**  **(%, 95% CI)** |
| --- | --- | --- | --- | --- | --- | --- |
| Cataract | 20  (15.5; 10.1-22.7) | 10  (18.5; 10.1-31.0) | 16  (50.0; 33.6-66.4) | 5  (50.0; 23.7-76.3) | 30  (16.3; 11.6-22.4) | 21  (50.0; 35.5-64.5) |
| Refractive Error | 94  (72.3; 64.0-79.3) | 36  (66.7; 53.3-77.8) | 6  (18.8; 8.5-35.7) | 0  (0.0, 0.0-24.9) | 130  (70.7; 63.7-76.8) | 6  (14.4; 6.3-28.2) |
| ARMD | 9  (6.9; 3.5-12.8) | 0  (0.0; 0.0-5.7) | 3  (9.3; 2.5-25.0) | 0  (0.0; 0.0-24.9) | 9  (4.9; 2.5-9.2) | 3  (7.1; 1.8-19.7) |
| Glaucoma | 3  (2.3; 0.5-6.9) | 1  (1.8; 0.0-10.7) | 3  (9.3; 2.5-25.0) | 1  (10.0; 0.0-42.6) | 4  (2.2; 0.7-5.7) | 4  (9.5; 3.2-22.6) |
| Maculopathy | 2  (1.5; 0.1-5.8)[2] | 3  (5.6; 1.3-15.7)[3] | 2  (6.3; 0.7-21.2)[1] | 1  (10.0; 0.0-42.6)[1] | 5  (2.7; 1.0-6.4) | 3  (7.1; 1.8-19.7) |
| Retinopathy | 2  (1.5; 0.1-5.8) | 3  (5.6; 1.3-15.7) | 2  (6.3; 0.7-21.2) | 2  (20.0; 4.6-52.1) | 5  (2.7; 1.0-6.4) | 4  (9.5; 3.2-22.6) |
| Optic Neuropathy | 0  (0.0; 0.0-2.5) | 1  (1.8; 0.0-17.1) | 0  (0.0; 0.0-9.3) | 1  (10.0; 0.0-42.6) | 1  (0.5; 0.0-3.3) | 1  (2.4; 0.0-13.4) |
| **Total** | 130 (100) | 54 (100) | 32 (100) | 10 (100) | 184 (100) | 42 (100) |

Numbers of infectious causes appears in [].CI = Confidence interval, VI = visual impairment, WHO = World Health Organization.
